# Supplementary material for: Metabolic Rewiring toward Oxidative Phosphorylation Disrupts Intrinsic Resistance to Ferroptosis of the Colon Adenocarcinoma Cells
Source: MDPI journal article supplement (doi:10.3390/antiox11122412), 2022-12-06
Supplement: s1 [file s1]

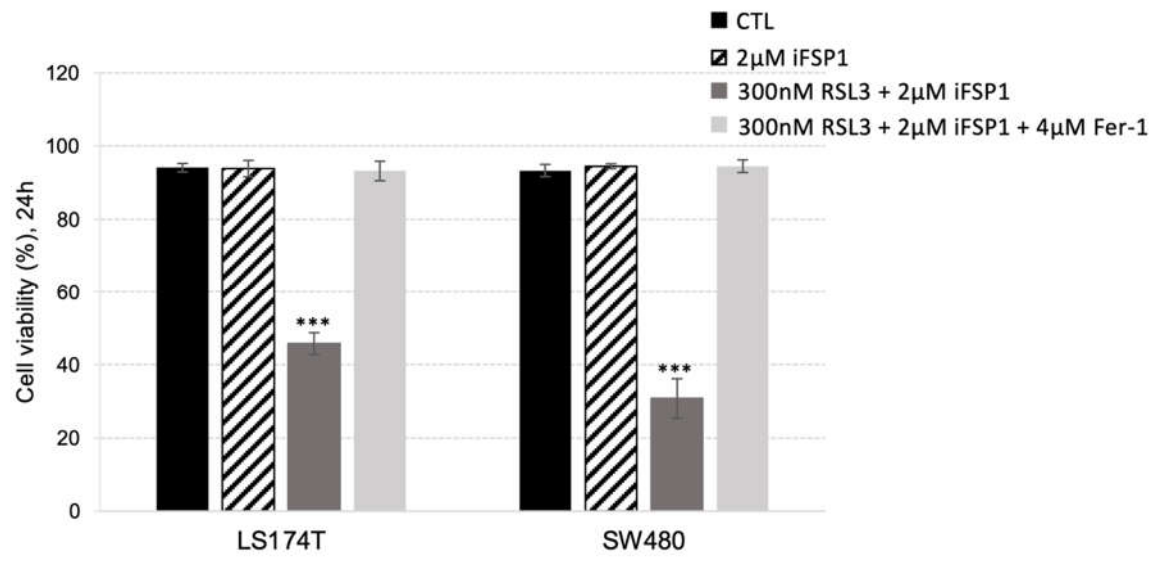

Supplementary Figure S1

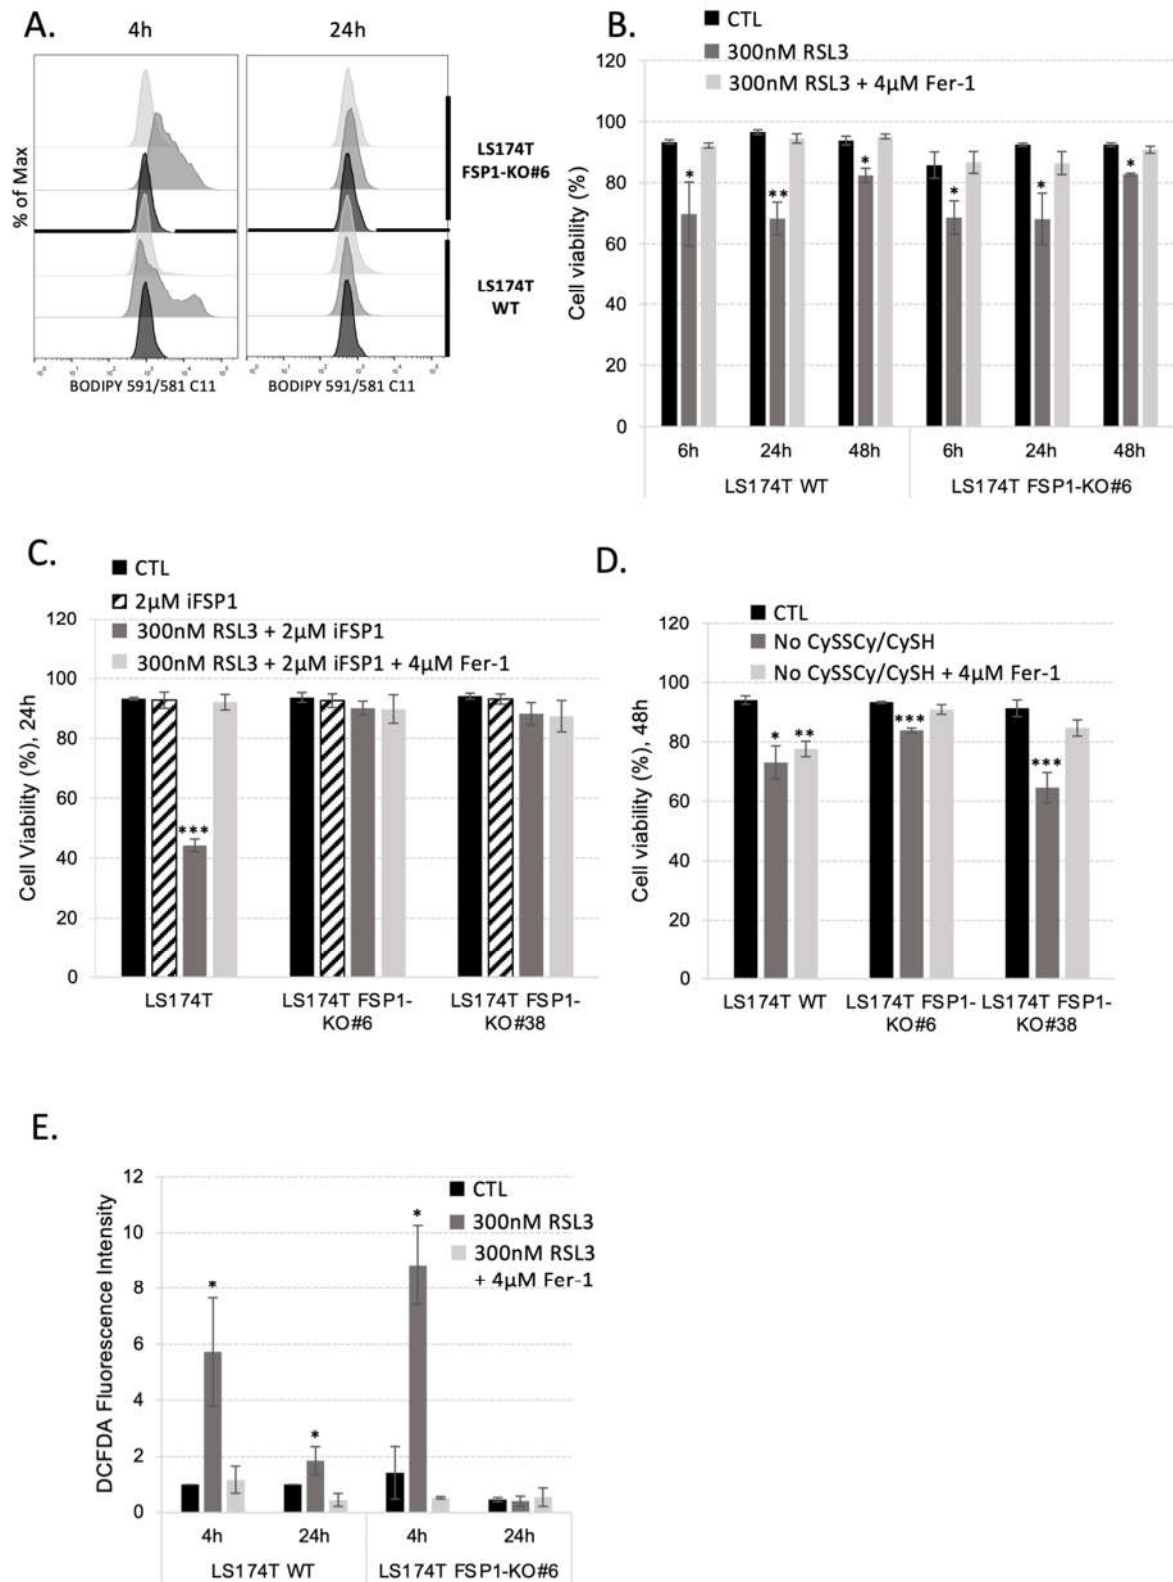

Supplementary Figure S2

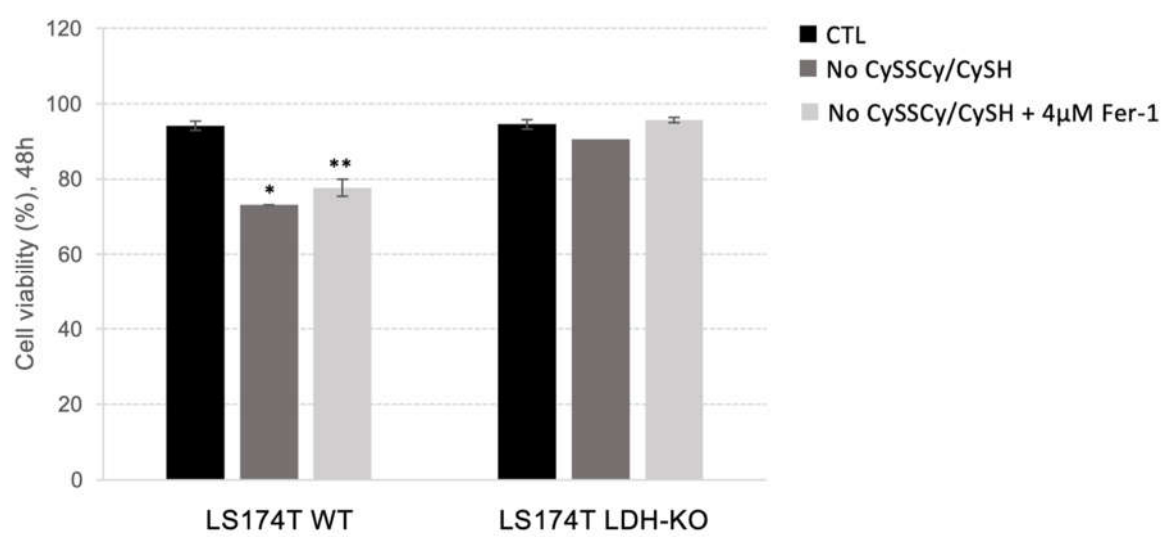

Supplementary Figure S3

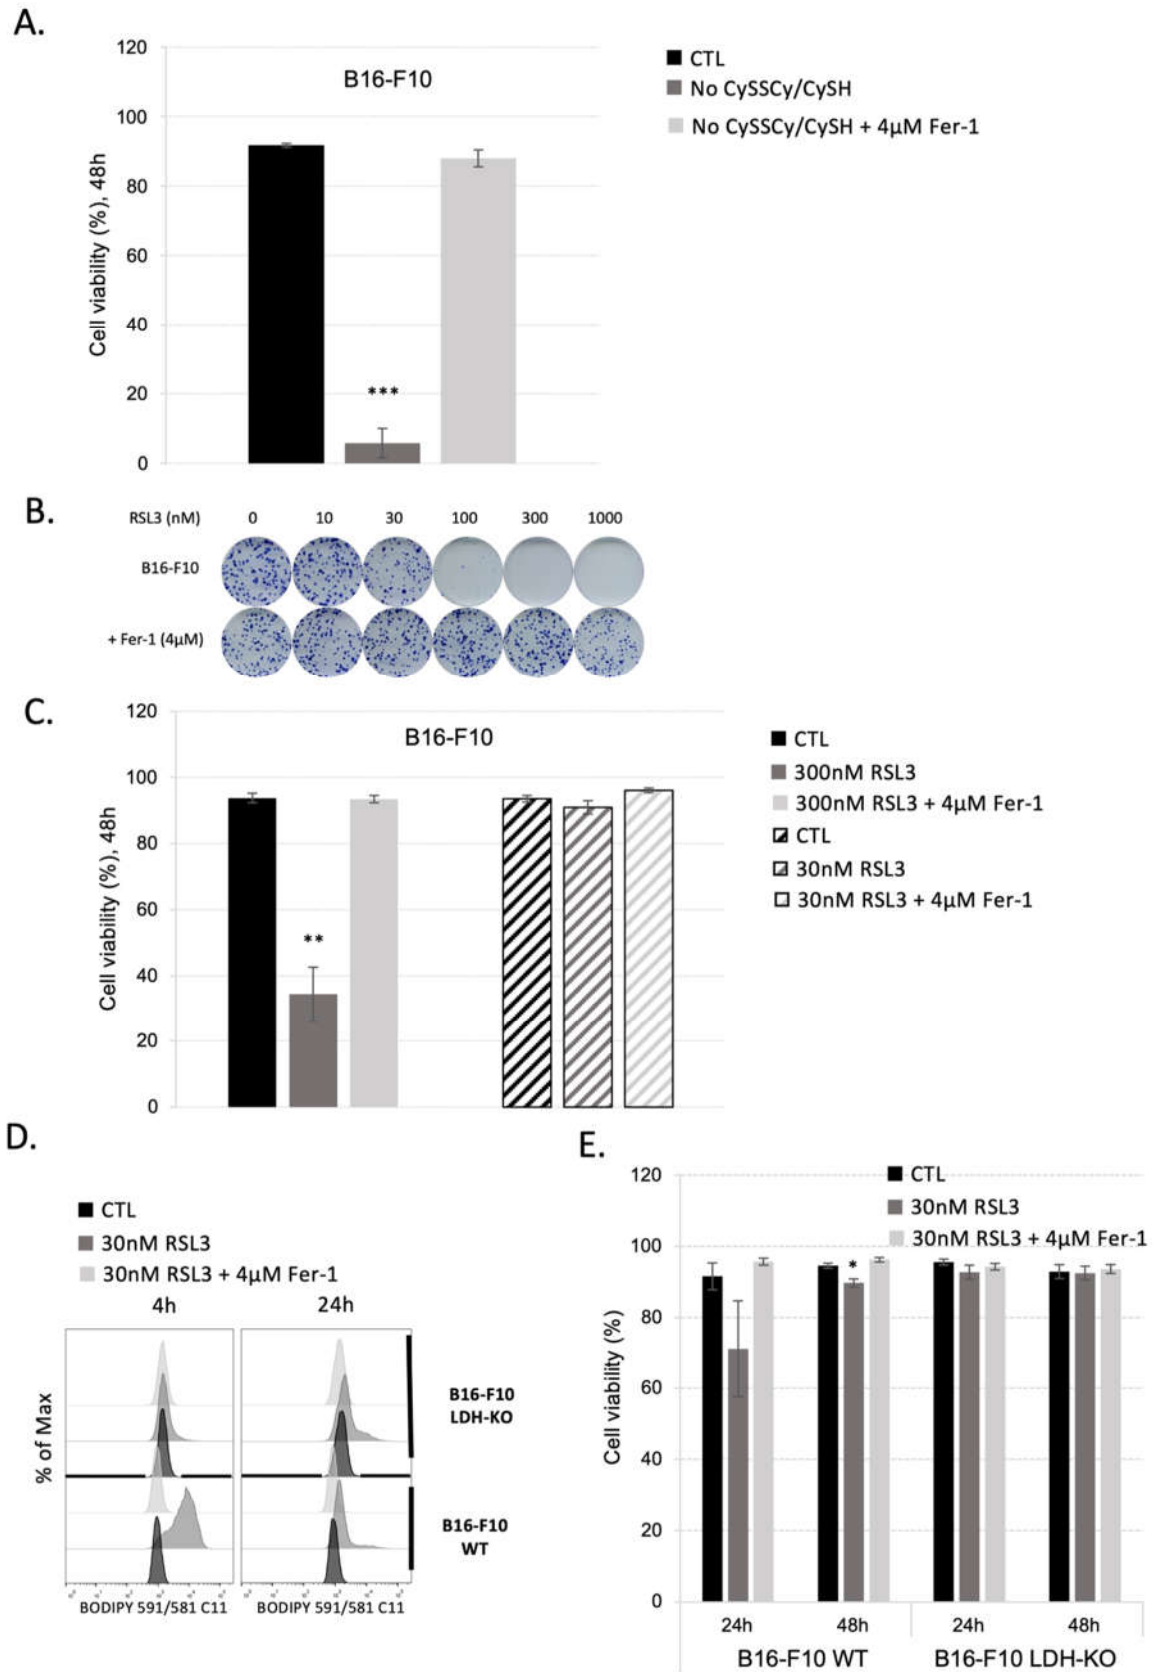

Supplementary Figure S4

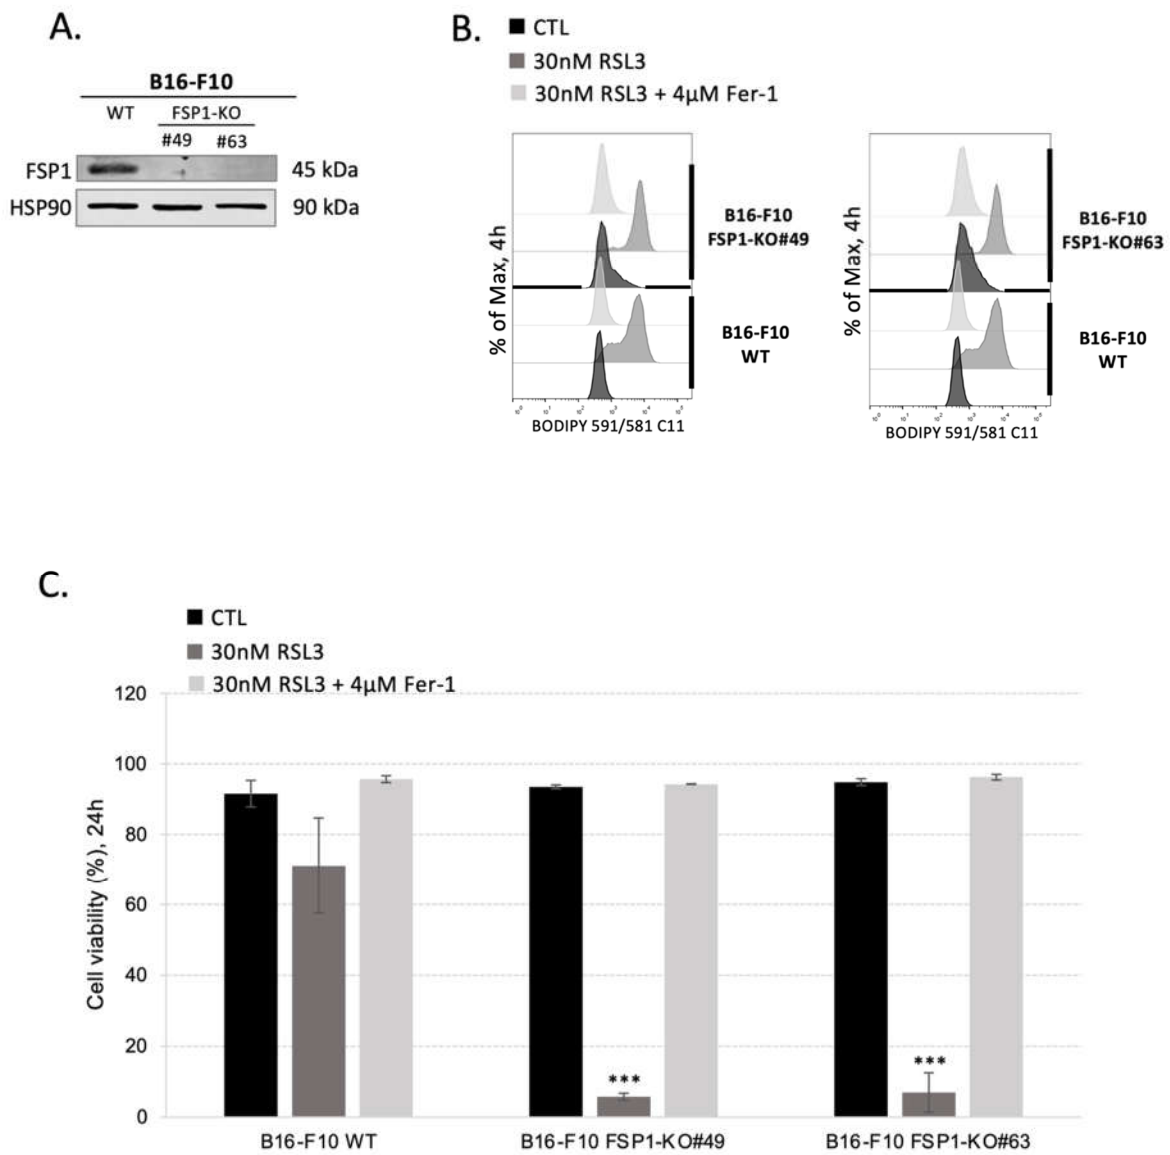

Supplementary Figure S5

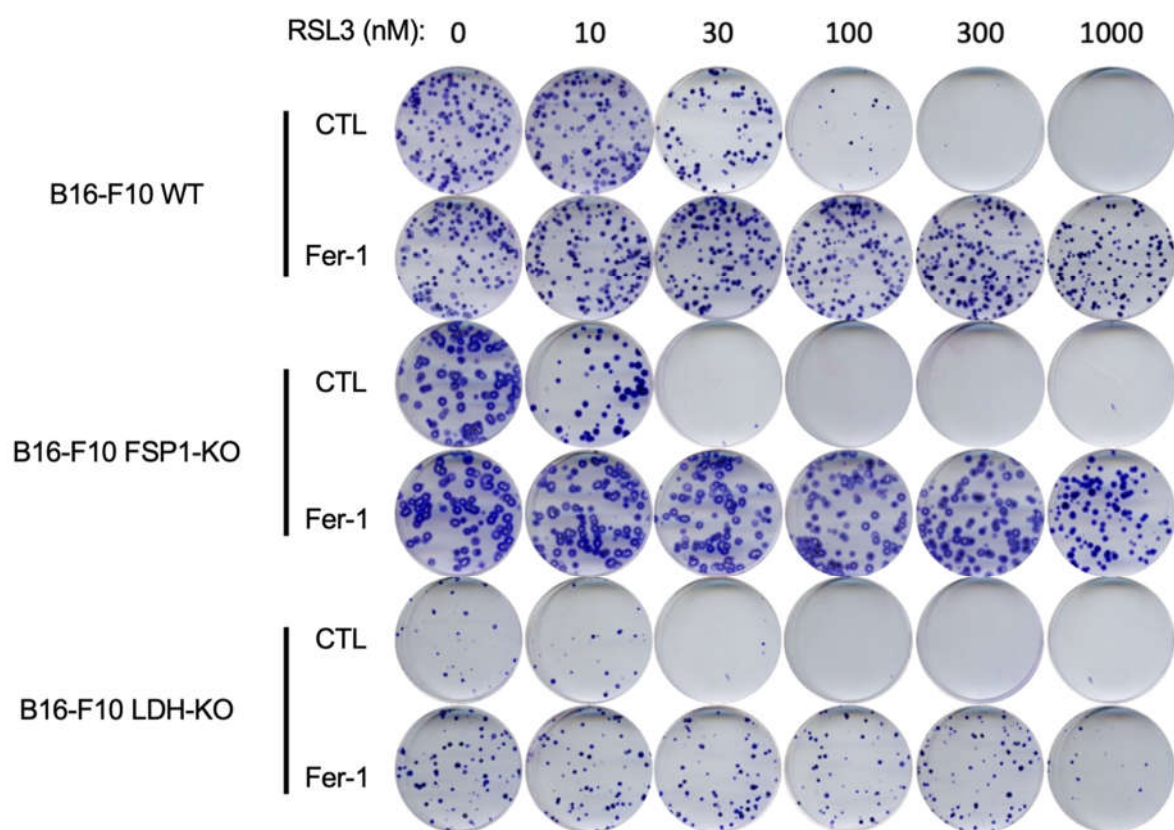

Supplementary Figure S6

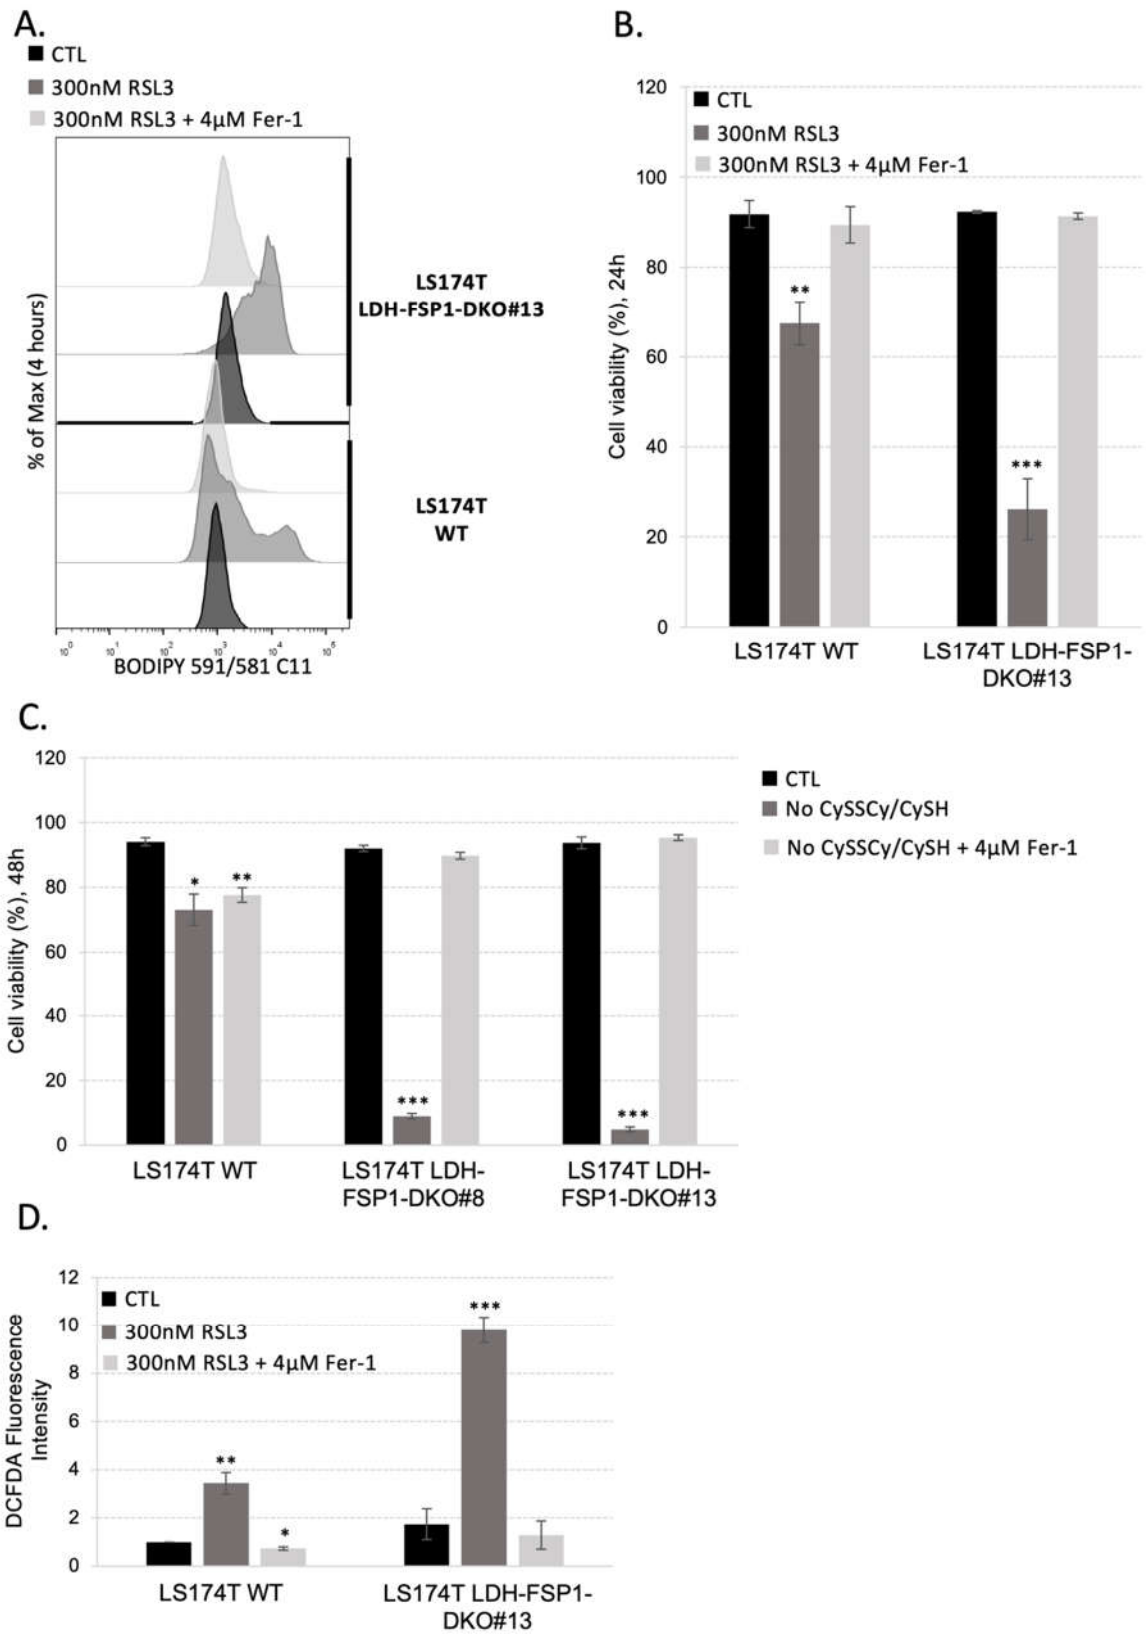

Supplementary Figure S7

## SUPPLEMENTARY FIGURE LEGENDS:

### Supplementary Figure S1.

The sensitivity of the CRC cells to cysteine starvation. Cell viability was measured in LS174T and SW480 cells using PI staining method (see Material & Methods). Cells were seeded in media supplemented or not with 2 $\mu$ M iFSP1, 300nM RSL3, in the presence or not of 4 $\mu$ M Fer-1. Cell viability was analyzed after 24h and the results are presented as mean  $\pm$  SEM, n=3. \*\*\*p<0.001, \*comparison with corresponding cell line in control conditions.

### Supplementary Figure S2.

Characterization of the FSP1-KO#6.

- A. Lipid hydroperoxide content was measured in LS174T WT and FSP1-KO#6 cells 4h and 24h upon seeding in media supplemented or not with 300nM RSL3, in the presence or not of 4 $\mu$ M Fer-1. Presented histograms are representative of three independent experiments.
- B. Cell viability was measured in LS174T WT and FSP1-KO#6 cells using PI staining method (see Material & Methods). Cells were seeded in media supplemented or not with 300nM RSL3, in the presence or not of 4 $\mu$ M Fer-1. Cell viability was analyzed after 6h, 24h and 48h. The results are presented as mean  $\pm$  SEM, n=3. \*p<0.05, \*\*p<0.01, \*comparison with corresponding cell line in control conditions.
- C. Cell viability was measured in LS174T WT and FSP1-KO#6 cells using PI staining method (see Material & Methods). Cells were seeded in media supplemented or not with 2 $\mu$ M iFSP1, 300nM RSL3, in the presence or not of 4 $\mu$ M Fer-1. Cell viability was analyzed after 24h. The results are presented as mean  $\pm$  SEM, n=3. \*\*\*p<0.001, \*comparison with corresponding cell line in control conditions.
- D. LS174T WT and FSP1-KO#6 and #38 cells were seeded in media containing or not cyst(e)ine, supplemented or not with 4 $\mu$ M Fer-1. Cell viability was analyzed after 48 hours. The results are presented as mean  $\pm$  SEM, n=3. \*p<0.05, \*\*p<0.01, \*\*\*p<0.001, \*comparison with corresponding cell line in control conditions.
- E. Intracellular ROS level was measured by DCFDA staining (see Material & Methods) in LS174T WT and FSP1-KO#6 4h and 24h after seeding in media supplemented or not with 300nM RSL3, in the presence or not of 4 $\mu$ M Fer-1. Intracellular ROS level are presented as a fold of change (mean  $\pm$  SEM, n=3). \*p<0.05, \*comparison with corresponding cell line in control conditions.

### Supplementary Figure S3.

The sensitivity of the LS174T WT and LDH-KO to cysteine starvation.

LS174T WT and LDH-KO cells were seeded in media containing or not cyst(e)ine, supplemented or not with 4 $\mu$ M Fer-1. Cell viability was analyzed after 48 hours. The results are presented as mean  $\pm$  SEM, n=3. \*p<0.05, \*\*p<0.01, \*comparison with corresponding cell line in control conditions.

### Supplementary Figure S4.

Ferroptosis in B16-F10.

- A. B16-F10 cells were seeded in the media supplemented or not with cyst(e)ine, in the presence or not of 4 $\mu$ M Fer-1. After 48h cell death was analyzed using PI staining. \*\*\*p<0.001, \*comparison with the control.
- B. B16-F10 cells were cultivated in DMEM media supplemented with increasing concentration of GPX4 inhibitor - RSL3 (0, 10, 30, 100, 300, 1000 nM), supplemented or not with 4 $\mu$ M Ferrostatin-1 (Fer-1). After 7 days colonies were colored for visualization using Giemsa. Representative images are shown.



- C. B16-F10 cells were seeded in the media supplemented or not with 300nM or 30nM RSL3, in the presence or not of 4μM Fer-1. After 48h cell death was analyzed. \*\*p<0.01, \*comparison with the corresponding control.
- D. Lipid hydroperoxide content was measured in B16-F10 WT and LDH-KO 4h and 24h upon seeding in media supplemented or not with 30nM RSL3 and 4μM Fer-1. Presented histograms are representative of three independent experiments.
- E. Cell viability was measured in WT and LDH-KO B16-F10 using PI staining method (see Material & Methods). Cells were seeded in media with 30nM RSL3, supplemented or not with 4μM Fer-1. Cell viability was analyzed after 24h and 48h. The results are presented as mean ± SEM, n=3. \*p<0.05, \*comparison with corresponding cell line in control conditions.

#### **Supplementary Figure S5.**

B16-F10 FSP1-KO are sensitive to GPX4 inhibition.

- A. The expression of FSP1 was analyzed in B16-F10 WT and two independent FSP1-KO (#49 and #63). Three independent experiments were performed, and representative blots are shown.
- B. Lipid hydroperoxide content was measured in B16-F10 WT and two independent FSP1-KO (#49 and #63) 4h upon seeding in media supplemented or not with 30nM RSL3, in the presence or not of 4μM Fer-1. Presented histograms are representative of three independent experiments.
- C. Cell viability was measured in B16-F10 WT and two independent FSP1-KO (#49 and #63) using PI staining method (see Material & Methods). Cells were seeded in media with or not 30nM, in the presence or not of 4μM Fer-1. Cell viability was analyzed after 24 hours. The results are presented as mean ± SEM, n=3. \*\*\*p<0.001, \*comparison with corresponding cell line in control conditions.

#### **Supplementary Figure S6.**

Clonal growth of B16-F10 WT, FSP1-KO and LDH-KO cells. Cells were cultivated 7 days in DMEM media supplemented with increasing concentration of RSL3 (0, 10, 30, 100, 300, 1000nM), in the presence or not of 4μM Fer-1. At the end of experiment clones were colored for visualization using Giemsa. Representative images are shown.

#### **Supplementary Figure S7.**

Metabolic rewiring toward OXPHOS disrupts intrinsic resistance to ferroptosis of the CRC cells.

- A. Lipid hydroperoxide content was measured in LS174T WT and LDH-FSP1-DKO#13 cells 4h upon seeding in media supplemented or not with 300nM RSL3, in the presence or not of 4μM Fer-1. Presented histograms are representative of three independent experiments.
- B. LS174T WT and LDH-FSP1-DKO#13 cells were seeded in media supplemented or not with 300nM RSL3, in the presence or not of 4μM Fer-1. Cell viability was analyzed after 24 hours. The results are presented as mean ± SEM, n=3. \*\*p<0.01, \*\*\*p<0.001, \*comparison with corresponding cell line in control conditions.
- C. LS174T WT and two independent LDH-FSP1-DKO clones (#8 and #13) were seeded in media containing or not cyst(e)ine and supplemented or not with 4μM Fer-1. Cell viability was analyzed after 48 hours. The results are presented as mean ± SEM, n=3. \*p<0.05, \*\*p<0.01, \*\*\*p<0.001, \*comparison with corresponding cell line in control conditions.
- D. Intracellular ROS level was measured in LS174T WT and FSP1-KO#13 4h and 24h after seeding in media supplemented or not with 300nM RSL3, in the presence or not of 4μM Fer-1. Intracellular ROS level are presented as a fold of change (mean ± SEM, n=3). \*p<0.05, \*\*p<0.01, \*\*\*p<0.001, \*comparison with corresponding cell line in control conditions.
